# Supplementary material for: New 3,4,5-trisubstituted isoxazole derivatives with potential biological properties
Source: Royal Society of Chemistry journal article supplement (doi:10.1039/c4nj02427c), 2015-01-01
Supplement: c4nj02427c1.pdf [file c4nj02427c1.pdf]

New Journal of Chemistry, January 2015

- Supplementary Information -

## **New 3,4,5-Trisubstituted Isoxazoles Derivatives with potential biological properties**

Carlos Bustos<sup>a,\*</sup>, Elies Molins<sup>b</sup>, Juan-Guillermo Cárcamo<sup>c</sup>, Marcelo N. Aguilar<sup>c</sup>, Christian Sánchez<sup>a</sup>, Ignacio Moreno-Villoslada<sup>a</sup>, Hiroyuki Nishide<sup>d</sup>, Angela Mesías-Salazar<sup>a</sup>, Ximena Zarate<sup>e</sup>, Eduardo Schott<sup>f,\*</sup>

<sup>a</sup>*Instituto de Ciencias Químicas, Universidad Austral de Chile, Las Encinas 220, Campus Isla Teja, Valdivia, Chile.*

<sup>b</sup>*Institut de Ciència de Materials de Barcelona (ICMAB-CSIC), Campus de la Universitat Autònoma de Barcelona, 08193 Bellaterra, Spain.*

<sup>c</sup>*Instituto de Bioquímica y Microbiología, Universidad Austral de Chile, Campus Isla Teja, Valdivia, Chile.*

<sup>d</sup>*Department of Applied Chemistry, School of Science and Engineering, Waseda University, Tokyo 169-8555, Japan.*

<sup>e</sup>*Dirección de Postgrado e Investigación, Universidad Autónoma de Chile, Carlos Antunez 1920, Santiago, Chile.*

<sup>f</sup>*Laboratorio de Bionanotecnología, Universidad Bernardo O'Higgins, General Gana 1702, Santiago, Chile.*

**\*email: [maschotte@gmail.com](mailto:maschotte@gmail.com), Phone/Fax: 56-2-24772243.**

### **Geometrical Parameters**

**Figure S1.** General diagram of the studied compounds that contain different substituents groups on the aromatic ring. In grey C atoms, in blue N atoms, in red O atom, in blue H atoms.

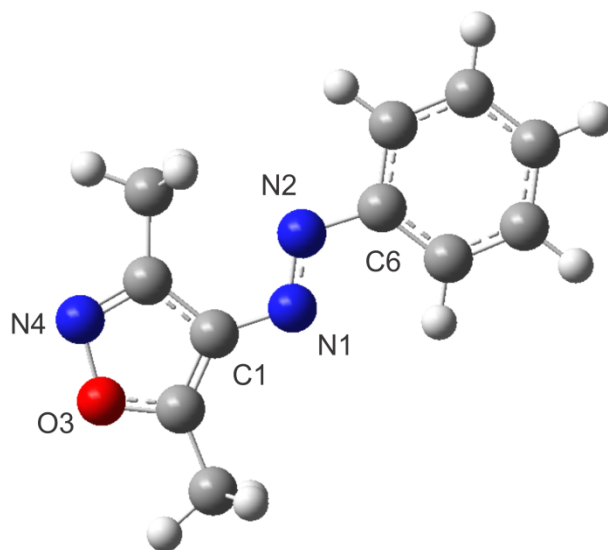

**Table S1.** Selected bond distances (Å) and angles (°) of the molecular structures of complexes (1)-(18). The numeration of the atoms is shown in Figure S1. Also the C-R distance corresponds to the distance between the substituted aromatic carbon in the phenyl ring in the corresponding position (*ortho*, *meta* or *para*).

|      | <b>C-R</b> | <b>C6-N2</b> | <b>N2-N1</b> | <b>N1-C1</b> | <b>dihedral</b> | <b>O3-N4</b> |
|------|------------|--------------|--------------|--------------|-----------------|--------------|
| (1)  | 1.47       | 1.42         | 1.26         | 1.39         | 0               | 1.42         |
| (2)  | 1.37       | 1.41         | 1.27         | 1.39         | 0               | 1.42         |
| (3)  | 1.42       | 1.42         | 1.27         | 1.39         | 0               | 1.42         |
| (4)  | 1.36       | 1.41         | 1.27         | 1.39         | 0               | 1.42         |
| (5)  | 1.09       | 1.42         | 1.26         | 1.39         | 0               | 1.42         |
| (6)  | 1.76       | 1.42         | 1.27         | 1.39         | 0               | 1.42         |
| (7)  | 1.90       | 1.42         | 1.27         | 1.39         | 0               | 1.42         |
| (8)  | 1.49       | 1.42         | 1.27         | 1.39         | 0               | 1.42         |
| (9)  | 1.49       | 1.42         | 1.27         | 1.39         | 0               | 1.42         |
| (10) | 1.50       | 1.42         | 1.27         | 1.39         | 0               | 1.42         |
| (11) | 1.43       | 1.42         | 1.27         | 1.38         | 0               | 1.42         |
| (12) | 1.47       | 1.42         | 1.27         | 1.38         | 0               | 1.42         |
| (13) | 1.52       | 1.42         | 1.27         | 1.39         | 0               | 1.42         |
| (14) | 1.76       | 1.42         | 1.26         | 1.39         | 0               | 1.42         |
| (15) | 1.36       | 1.41         | 1.27         | 1.39         | 0               | 1.42         |
| (16) | 1.75       | 1.41         | 1.27         | 1.39         | 0               | 1.42         |
| (17) | 1.49       | 1.42         | 1.26         | 1.39         | 160             | 1.42         |
| (18) | 1.48       | 1.41         | 1.27         | 1.38         | 155             | 1.43         |

### Molecular Orbitals

The occupied frontier molecular orbitals more stables are showed by the compounds 11 and 18 and the less stables are showed by 1 and 4. The gap HL values are between 3.32 and 3.91 eV.

**Figure S2.** Molecular orbital diagrams for the selected frontier MOs of (1)–(18) complexes and orbital energies and HOMO-LUMO gap. Values in (eV).

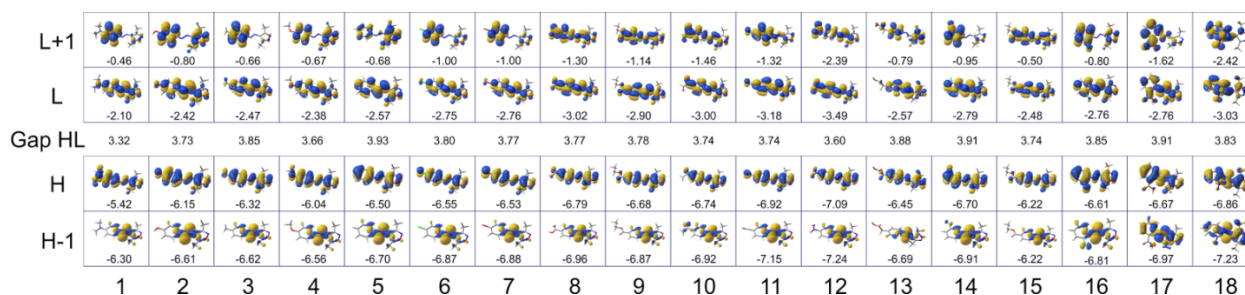

## IR

**Table S2.** Calculated and experimental IR of selected active frequencies ( $\text{cm}^{-1}$ ) for Compounds 1-18

|              |        |       |        |       |        |       |       |       |
|--------------|--------|-------|--------|-------|--------|-------|-------|-------|
| <b>1</b>     |        |       |        |       |        |       |       |       |
| experimental | n(N=N) | or    | n(C=N) | 1600s | n(C=C) | 1561m | 1517m |       |
| theoretical  |        |       |        | 1619  |        | 1545  | 1540  |       |
| <b>2</b>     |        |       |        |       |        |       |       |       |
| experimental | n(N=N) | or    | n(C=N) | 1617s | n(C=C) | 1586s | and   | 1508m |
| theoretical  |        |       |        | 1619  |        | 1545  |       | 1540  |
| <b>3</b>     |        |       |        |       |        |       |       |       |
| experimental | n(N=N) | or    | n(C=N) | 1610s | n(C=C) | 1589m | and   | 1497m |
| theoretical  |        |       |        | 1654  |        | 1615  |       | 1541  |
| <b>4</b>     |        |       |        |       |        |       |       |       |
| experimental | n(N=N) | or    | n(C=N) | 1601s | n(C=C) | 1579s | 1497s |       |
| theoretical  |        |       |        | 1624  |        | 1546  | 1509  |       |
| <b>5</b>     |        |       |        |       |        |       |       |       |
| experimental | n(N=N) | or    | n(C=N) | 1611f | n(C=C) | 1592m | and   | 1504w |
| theoretical  |        |       |        | 1631  |        | 1620  |       | 1542  |
| <b>6</b>     |        |       |        |       |        |       |       |       |
| experimental | n(N=N) | or    | n(C=N) | 1612s | n(C=C) | 1590m | 1576w |       |
| theoretical  |        |       |        | 1624  |        | 1541  | 1527  |       |
| <b>7</b>     |        |       |        |       |        |       |       |       |
| experimental | n(N=N) | or    | n(C=N) | 1605s | n(C=C) | 1584m | and   | 1569m |
| theoretical  |        |       |        | 1624  |        | 1611  |       |       |
| <b>8</b>     |        |       |        |       |        |       |       |       |
| experimental | n(C=C) | 1597s | 1581m  | 1505w |        |       |       |       |
| theoretical  |        | 1612  | 1542   | 1538  |        |       |       |       |
| <b>9</b>     |        |       |        |       |        |       |       |       |
| experimental | n(N=N) | or    | n(C=N) | 1611w | n(C=C) | 1598s |       |       |
| theoretical  |        |       |        | 1623  |        | 1613  |       |       |
| <b>10</b>    |        |       |        |       |        |       |       |       |

|              |        |        |             |        |        |        |       |       |
|--------------|--------|--------|-------------|--------|--------|--------|-------|-------|
| experimental | n(C=C) | 1595s  | 1498w       |        |        |        |       |       |
| theoretical  |        | 1623   | 1503<br>n=n |        |        |        |       |       |
| <b>11</b>    |        |        |             |        |        |        |       |       |
| experimental | n(N=N) | or     | n(C=N)      | 1613s  | n(C=C) | 1597s  |       |       |
| theoretical  |        |        |             | 1621   |        | 1604   |       |       |
| <b>12</b>    |        |        |             |        |        |        |       |       |
| experimental | n(N=N) | or     | n(C=N)      | 1607s  | n(C=C) | 1583m  | 1518m |       |
| theoretical  |        |        |             | 1619   |        | 1590   | 1525  |       |
| <b>13</b>    |        |        |             |        |        |        |       |       |
| experimental | 1726s  | n(N=N) | or          | n(C=N) | 1612s  | n(C=C) | 1592w | 1504d |
| theoretical  |        |        |             |        | 1636   |        | 1624  | 1542  |
| <b>14</b>    |        |        |             |        |        |        |       |       |
| experimental | n(N=N) | or     | n(C=N)      | 1610s  | n(C=C) | 1587m  | 1575m | 1504w |
| theoretical  |        |        |             |        |        |        |       |       |
| <b>15</b>    |        |        |             |        |        |        |       |       |
| experimental | n(N=N) | or     | n(C=N)      | 1619s  | n(C=C) | 1582s  | 1511w |       |
| theoretical  |        |        |             | 1638   |        | 1621   | 1541  |       |
| <b>16</b>    |        |        |             |        |        |        |       |       |
| experimental | n(N=N) | or     | n(C=N)      | 1610s  | n(C=C) | 1586m  | 1503w |       |
| theoretical  |        |        |             | 1620   |        | 1612   | 1519  |       |
| <b>17</b>    |        |        |             |        |        |        |       |       |
| experimental | n(N=N) | or     | n(C=N)      | 1610m  | n(C=C) | 1593m  | 1509w |       |
| theoretical  |        |        |             | 1622   |        | 1615   | 1527  |       |
| <b>18</b>    |        |        |             |        |        |        |       |       |
| experimental | n(N=N) | or     | n(C=N)      | 1606s  | n(C=C) | 1524s  | 1474w |       |
| theoretical  |        |        |             | 1623   |        | 1544   | 1499  |       |

## TDDFT

All the electronic transitions that contribute to  $\lambda_{\max}$  are from HOMO-1 to LUMO. In the compounds 17 and 18 this peak also show a mainly contribution of the transition HOMO-LUMO and the biggest  $f$  than the  $f$  values of the other systems.

**Table S3.** Experimental (exp) and calculated (calc.) wavelength (nm), Energy (eV), Oscillator Strength  $f$ , Active MOs and their contributions for the vertical excitations from TDDFT for the  $\lambda_{\max}$ .

| Comp | R                                  | C(mol*L <sup>-1</sup> ) | $\lambda$ (nm)<br>exp. | $\lambda$ (nm)<br>calc. | E(eV) | $f$        | Active MO | Contrib. % |
|------|------------------------------------|-------------------------|------------------------|-------------------------|-------|------------|-----------|------------|
| (1)  | 4-N(CH <sub>3</sub> ) <sub>2</sub> | 4.09x10 <sup>-5</sup>   | 392                    | 412                     | 3.01  | 0.787<br>4 | 65 - 6    | 83.0       |
|      |                                    |                         | 328                    | 303                     | 4.09  | 0.001<br>4 | 62 - 6    | 69.1       |
|      |                                    |                         |                        |                         |       |            | 65 - 6    | 24.2       |
|      |                                    |                         |                        |                         |       |            | 63 - 6    | 83.6       |
|      |                                    |                         |                        |                         |       |            | 65 - 6    | 4.2        |
| (2)  | 4-OH                               | 4.72x10 <sup>-5</sup>   | 346                    | 372                     | 3.33  | 0.774<br>1 | 57 - 5    | 81.2       |
|      |                                    |                         | 246                    | 241                     | 5.13  | 0.163<br>3 | 53 - 5    | 67.4       |
|      |                                    |                         |                        |                         |       |            | 57 - 6    | 23.8       |
| (3)  | 4-CH <sub>3</sub>                  | 6.37x10 <sup>-5</sup>   | 323                    | 357                     | 3.47  | 0.787<br>7 | 57 - 5    | 81.7       |
|      |                                    |                         | 312h                   | 312                     | 3.98  | 0.026<br>2 | 55 - 5    | 90.8       |
|      |                                    |                         |                        |                         |       |            | 57 - 6    | 5.2        |
|      |                                    |                         | 240                    | 242                     | 5.12  | 0.059<br>5 | 53 - 5    | 77.7       |
|      |                                    |                         |                        |                         |       |            | 57 - 5    | 4.9        |
|      |                                    |                         |                        |                         |       |            | 57 - 6    | 5.4        |
|      |                                    |                         |                        |                         |       |            | 57 - 5    | 35.2       |
| (4)  | 4-OCH <sub>3</sub>                 | 4.58x10 <sup>-5</sup>   | 234                    | 234                     | 5.29  | 0.213<br>0 | 57 - 5    | 35.2       |
|      |                                    |                         |                        |                         |       |            | 57 - 6    | 47.1       |
|      |                                    |                         | 228h                   | 223                     | 5.56  | 0.000<br>1 | 52 - 5    | 97.5       |
|      |                                    |                         | 346h                   | 377                     | 3.28  | 0.782<br>3 | 61 - 6    | 81.7       |
|      |                                    |                         |                        |                         |       | 58 - 6     | 4.0       |            |
|      |                                    |                         |                        |                         |       | 59 - 6     | 82.7      |            |

|     |      |                       |      |     |      |       |    |   |   |      |
|-----|------|-----------------------|------|-----|------|-------|----|---|---|------|
|     |      |                       | 5    |     |      |       |    | > | 2 |      |
|     |      |                       |      |     |      |       | 61 | - | 6 | 7.5  |
|     |      |                       |      |     |      |       |    | > | 3 |      |
|     |      |                       | 242  | 252 | 4.91 | 0.063 |    | - | 6 | 2.2  |
|     |      |                       |      |     |      | 9     | 57 | > | 2 |      |
|     |      |                       |      |     |      |       |    | - | 6 | 6.5  |
|     |      |                       |      |     |      |       | 59 | > | 2 |      |
|     |      |                       |      |     |      |       |    | - | 6 | 76.1 |
|     |      |                       |      |     |      |       | 61 | > | 3 |      |
|     |      |                       | 317  | 350 | 3.55 | 0.720 |    | - | 5 | 81.6 |
|     |      |                       |      |     |      | 2     | 53 | > | 4 |      |
|     |      |                       | 308h | 313 | 3.96 | 0.033 |    | - | 5 | 91.2 |
|     |      |                       |      |     |      | 4     | 51 | > | 4 |      |
|     |      |                       |      |     |      |       |    | - | 5 | 4.5  |
|     |      |                       |      |     |      |       | 53 | > | 6 |      |
| (5) | 4-H  | 5.19x10 <sup>-5</sup> | 233h | 241 | 5.15 | 0.044 |    | - | 5 | 86.5 |
|     |      |                       |      |     |      | 8     | 49 | > | 4 |      |
|     |      |                       |      |     |      |       |    | - | 5 | 3.3  |
|     |      |                       |      |     |      |       | 53 | > | 8 |      |
|     |      |                       | 228  | 229 | 5.42 | 0.222 |    | - | 5 | 2.8  |
|     |      |                       |      |     |      | 3     | 50 | > | 4 |      |
|     |      |                       |      |     |      |       |    | - | 5 | 24.6 |
|     |      |                       |      |     |      |       | 53 | > | 5 |      |
|     |      |                       |      |     |      |       |    | - | 5 | 56.2 |
|     |      |                       |      |     |      |       | 53 | > | 6 |      |
|     |      |                       | 222h | 224 | 5.53 | 0.000 |    | - | 5 | 97.5 |
|     |      |                       |      |     |      | 1     | 48 | > | 4 |      |
|     |      |                       | 324  | 359 | 3.45 | 0.826 |    | - | 6 | 82.3 |
|     |      |                       |      |     |      | 4     | 61 | > | 2 |      |
|     |      |                       | 313h | 301 | 4.12 | 0.021 |    | - | 6 | 88.3 |
|     |      |                       |      |     |      | 2     | 59 | > | 2 |      |
| (6) | 4-Cl | 5.13x10 <sup>-5</sup> |      |     |      |       |    | - | 6 | 8.6  |
|     |      |                       |      |     |      |       | 61 | > | 3 |      |
|     |      |                       | 239h | 239 | 5.18 | 0.000 |    | - | 6 | 98.4 |
|     |      |                       |      |     |      | 1     | 60 | > | 4 |      |
|     |      |                       | 233  | 232 | 5.35 | 0.173 |    | - | 6 | 85.0 |
|     |      |                       |      |     |      | 9     | 61 | > | 4 |      |
|     |      |                       | 227  | 227 | 5.47 | 0.000 |    | - | 6 | 92.0 |
|     |      |                       |      |     |      | 1     | 55 | > | 2 |      |
|     |      |                       |      |     |      |       |    | - | 6 | 5.7  |
|     |      |                       |      |     |      |       | 56 | > | 2 |      |
|     |      |                       | 325  | 363 | 3.41 | 0.863 |    | - | 7 | 82.9 |
|     |      |                       |      |     |      | 4     | 70 | > | 1 |      |
|     |      |                       | 315h | 302 | 4.11 | 0.021 |    | - | 7 | 87.2 |
|     |      |                       |      |     |      | 5     | 68 | > | 1 |      |
|     |      |                       |      |     |      |       |    | - | 7 | 9.0  |
|     |      |                       |      |     |      |       | 70 | > | 2 |      |
|     |      |                       | 240h | 252 | 4.93 | 0.045 |    | - | 7 | 90.7 |
|     |      |                       |      |     |      | 8     | 65 | > | 1 |      |
| (7) | 4-Br | 5.09x10 <sup>-5</sup> |      |     |      |       |    | - | 7 | 2.3  |
|     |      |                       |      |     |      |       | 67 | > | 1 |      |
|     |      |                       | 234  | 233 | 5.31 | 0.161 |    | - | 7 | 3.0  |
|     |      |                       |      |     |      | 8     | 63 | > | 1 |      |
|     |      |                       |      |     |      |       |    | - | 7 | 84.6 |
|     |      |                       |      |     |      |       | 70 | > | 3 |      |

|      |                                                   |                       |      |     |      |            |        |        |        |        |      |
|------|---------------------------------------------------|-----------------------|------|-----|------|------------|--------|--------|--------|--------|------|
|      |                                                   |                       | 227h | 216 | 5.73 | 0.017<br>6 | 63     | -<br>> | 7<br>1 | 64.2   |      |
|      |                                                   |                       |      |     |      |            | 69     | -<br>> | 7<br>4 | 4.6    |      |
|      |                                                   |                       |      |     |      |            | 70     | -<br>> | 7<br>5 | 22.4   |      |
| (8)  | 4-CO <sub>2</sub> H                               | 4.79x10 <sup>-5</sup> | 322  | 361 | 3.43 | 0.914<br>0 | 64     | -<br>> | 6<br>5 | 82.1   |      |
|      |                                                   |                       | 233h | 215 | 5.78 | 0.109<br>9 | 57     | -<br>> | 6<br>5 | 68.0   |      |
|      |                                                   |                       |      |     |      |            |        | 62     | -<br>> | 6<br>6 | 7.0  |
|      |                                                   |                       | 227  | 212 | 5.86 | 0.000<br>6 | 56     | -<br>> | 6<br>5 | 85.0   |      |
|      |                                                   |                       |      |     |      |            |        | 60     | -<br>> | 6<br>6 | 10.5 |
|      |                                                   |                       | 221h | 204 | 6.08 | 0.001<br>3 | 64     | -<br>> | 6<br>9 | 90.8   |      |
|      |                                                   |                       |      |     |      | 64         | -<br>> | 7<br>0 | 6.2    |        |      |
| (9)  | 4-CO <sub>2</sub> CH <sub>2</sub> CH <sub>3</sub> | 4.67x10 <sup>-5</sup> | 322  | 362 | 3.43 | 0.945<br>1 | 72     | -<br>> | 7<br>3 | 82.2   |      |
|      |                                                   |                       | 232h | 234 | 5.31 | 0.021<br>1 | 66     | -<br>> | 7<br>3 | 24.5   |      |
|      |                                                   |                       |      |     |      |            |        | 70     | -<br>> | 7<br>4 | 24.0 |
|      |                                                   |                       |      |     |      |            |        | 72     | -<br>> | 7<br>5 | 43.1 |
|      |                                                   |                       |      |     |      |            |        | 72     | -<br>> | 7<br>6 | 2.0  |
|      |                                                   |                       | 227  | 229 | 5.41 | 0.000<br>0 | 65     | -<br>> | 7<br>3 | 2.1    |      |
|      |                                                   |                       |      |     |      |            |        | 71     | -<br>> | 7<br>6 | 95.0 |
|      |                                                   |                       | 220h | 223 | 5.56 | 0.063<br>4 | 70     | -<br>> | 7<br>4 | 20.4   |      |
|      |                                                   |                       |      |     | 72   | -<br>>     | 7<br>5 | 19.8   |        |        |      |
|      |                                                   |                       |      |     |      | 72         | -<br>> | 7<br>6 | 50.2   |        |      |
| (10) | 4-COCH <sub>3</sub>                               | 4.77x10 <sup>-5</sup> | 330  | 366 | 3.39 | 0.950<br>5 | 64     | -<br>> | 6<br>5 | 82.1   |      |
|      |                                                   |                       | 229  | 221 | 5.61 | 0.201<br>9 | 64     | -<br>> | 6<br>8 | 80.5   |      |
| (11) | 4-CN                                              | 5.00x10 <sup>-5</sup> | 321  | 362 | 3.43 | 0.946<br>9 | 59     | -<br>> | 6<br>0 | 81.9   |      |
|      |                                                   |                       | 234h | 237 | 5.23 | 0.113<br>2 | 55     | -<br>> | 6<br>0 | 6.2    |      |
|      |                                                   |                       |      |     |      |            |        | 57     | -<br>> | 6<br>1 | 4.5  |
|      |                                                   |                       |      |     |      |            |        | 59     | -<br>> | 6<br>1 | 38.3 |
|      |                                                   |                       |      |     |      |            |        | 59     | -<br>> | 6<br>2 | 32.7 |
|      |                                                   |                       | 227  | 233 | 5.31 | 0.016<br>4 | 55     | -<br>> | 6<br>0 | 2.7    |      |

|      |                                                                   |                       |      |     |      |       |  |    |   |   |      |
|------|-------------------------------------------------------------------|-----------------------|------|-----|------|-------|--|----|---|---|------|
|      |                                                                   |                       |      |     |      |       |  | 56 | - | 6 | 2.1  |
|      |                                                                   |                       |      |     |      |       |  | >  | - | 0 |      |
|      |                                                                   |                       |      |     |      |       |  | 57 | - | 6 | 8.2  |
|      |                                                                   |                       |      |     |      |       |  | >  | - | 1 |      |
|      |                                                                   |                       |      |     |      |       |  | 59 | - | 6 | 28.3 |
|      |                                                                   |                       |      |     |      |       |  | >  | - | 1 |      |
|      |                                                                   |                       |      |     |      |       |  | 59 | - | 6 | 45.3 |
|      |                                                                   |                       |      |     |      |       |  | >  | - | 2 |      |
|      |                                                                   |                       | 222  | 219 | 5.66 | 0.089 |  | 57 | - | 6 | 9.9  |
|      |                                                                   |                       |      |     |      | 4     |  | >  | - | 1 |      |
|      |                                                                   |                       |      |     |      |       |  | 59 | - | 6 | 77.8 |
|      |                                                                   |                       |      |     |      |       |  | >  | - | 3 |      |
| (12) | <b>4-NO<sub>2</sub></b>                                           | $4.75 \times 10^{-5}$ | 329  | 348 | 3.56 | 0.796 |  | 64 | - | 6 | 81.6 |
|      |                                                                   |                       |      |     |      | 5     |  | >  | - | 6 |      |
|      |                                                                   |                       | 217  | 224 | 5.52 | 0.147 |  | 57 | - | 6 | 3.0  |
|      |                                                                   |                       |      |     |      | 1     |  | >  | - | 6 |      |
|      |                                                                   |                       |      |     |      |       |  | 64 | - | 6 | 81.9 |
|      |                                                                   |                       |      |     |      |       |  | >  | - | 8 |      |
|      |                                                                   |                       | 322  | 358 | 3.47 | 0.837 |  | 76 | - | 7 | 82.0 |
|      |                                                                   |                       |      |     |      | 5     |  | >  | - | 7 |      |
|      |                                                                   |                       | 311h | 311 | 3.98 | 0.029 |  | 74 | - | 7 | 90.7 |
|      |                                                                   |                       |      |     |      | 0     |  | >  | - | 7 |      |
|      |                                                                   |                       |      |     |      |       |  | 76 | - | 7 | 5.1  |
|      |                                                                   |                       |      |     |      |       |  | >  | - | 9 |      |
| (13) | <b>4-CH<sub>2</sub>CO<sub>2</sub>CH<sub>2</sub>CH<sub>3</sub></b> | $4.53 \times 10^{-5}$ | 238h | 242 | 5.13 | 0.093 |  | 71 | - | 7 | 49.8 |
|      |                                                                   |                       |      |     |      | 7     |  | >  | - | 7 |      |
|      |                                                                   |                       |      |     |      |       |  | 76 | - | 7 | 27.6 |
|      |                                                                   |                       |      |     |      |       |  | >  | - | 9 |      |
|      |                                                                   |                       | 231  | 234 | 5.29 | 0.042 |  | 71 | - | 7 | 24.6 |
|      |                                                                   |                       |      |     |      | 4     |  | >  | - | 7 |      |
|      |                                                                   |                       |      |     |      |       |  | 76 | - | 7 | 35.6 |
|      |                                                                   |                       |      |     |      |       |  | >  | - | 8 |      |
|      |                                                                   |                       | 225h | 225 | 5.51 | 0.000 |  | 69 | - | 7 | 96.2 |
|      |                                                                   |                       |      |     |      | 1     |  | >  | - | 7 |      |
|      |                                                                   |                       | 315  | 351 | 3.53 | 0.720 |  | 61 | - | 6 | 81.9 |
|      |                                                                   |                       |      |     |      | 9     |  | >  | - | 2 |      |
|      |                                                                   |                       | 238h | 246 | 5.04 | 0.040 |  | 57 | - | 6 | 87.2 |
|      |                                                                   |                       |      |     |      | 1     |  | >  | - | 2 |      |
| (14) | <b>3-Cl</b>                                                       | $4.56 \times 10^{-5}$ |      |     |      |       |  | 58 | - | 6 | 2.3  |
|      |                                                                   |                       |      |     |      |       |  | >  | - | 2 |      |
|      |                                                                   |                       | 231  | 238 | 5.22 | 0.054 |  | 59 | - | 6 | 6.4  |
|      |                                                                   |                       |      |     |      | 6     |  | >  | - | 5 |      |
|      |                                                                   |                       |      |     |      |       |  | 61 | - | 6 | 78.7 |
|      |                                                                   |                       |      |     |      |       |  | >  | - | 3 |      |
|      |                                                                   |                       | 226h | 227 | 5.45 | 0.174 |  | 61 | - | 6 | 83.8 |
|      |                                                                   |                       |      |     |      | 8     |  | >  | - | 4 |      |
|      |                                                                   |                       | 368  | 384 | 3.23 | 0.473 |  | 55 | - | 5 | 5.0  |
|      |                                                                   |                       |      |     |      | 3     |  | >  | - | 8 |      |
|      |                                                                   |                       |      |     |      |       |  | 57 | - | 5 | 80.1 |
|      |                                                                   |                       |      |     |      |       |  | >  | - | 8 |      |
| (15) | <b>2-OH</b>                                                       | $5.06 \times 10^{-5}$ | 316  | 335 | 3.70 | 0.257 |  | 55 | - | 5 | 85.1 |
|      |                                                                   |                       |      |     |      | 1     |  | >  | - | 8 |      |
|      |                                                                   |                       |      |     |      |       |  | 57 | - | 5 | 3.0  |
|      |                                                                   |                       |      |     |      |       |  | >  | - | 8 |      |
|      |                                                                   |                       | 247  | 268 | 4.63 | 0.002 |  | 54 | - | 5 | 81.4 |
|      |                                                                   |                       |      |     |      |       |  | >  | - | 5 |      |



|      |                     |                       |      |     |       |       |    |   |     |      |   |      |
|------|---------------------|-----------------------|------|-----|-------|-------|----|---|-----|------|---|------|
|      |                     |                       |      |     |       | 7     |    | > | 8   |      |   |      |
|      |                     |                       |      |     |       |       | 57 | - | 5   | 10.7 |   |      |
|      |                     |                       |      |     |       |       |    | > | 9   |      |   |      |
|      |                     |                       | 214  | 217 | 5.70  | 0.001 | 55 | - | 5   | 86.8 |   |      |
|      |                     |                       |      |     |       | 2     |    | > | 9   |      |   |      |
| (16) | 2-Cl                | $4.71 \times 10^{-5}$ | 319  | 332 | 3.74  | 0.075 | 59 | - | 6   | 89.9 |   |      |
|      |                     |                       | 241  | 244 | 5.077 | 0.035 | 57 | - | 6   | 86.2 |   |      |
|      |                     |                       |      |     |       | 8     | 6  |   | >   | 2    |   |      |
|      |                     |                       | 235  | 239 | 5.19  | 0.066 | 61 | - | 6   | 77.1 |   |      |
|      |                     |                       |      |     |       | 1     |    |   | >   | 3    |   |      |
|      |                     |                       | 229h | 227 | 5.46  | 0.000 | 55 | - | 6   | 98.0 |   |      |
|      |                     |                       |      |     |       | 1     |    | > | 2   |      |   |      |
| (17) | 2-CO <sub>2</sub> H | $5.04 \times 10^{-5}$ | 313  | 343 | 3.61  | 0.571 | 63 | - | 6   | 51.6 |   |      |
|      |                     |                       |      |     |       | 8     |    |   | >   | 5    |   |      |
|      |                     |                       |      |     |       |       |    |   | 64  | -    | 6 | 31.4 |
|      |                     |                       |      |     |       |       |    |   |     | >    | 5 |      |
|      |                     |                       | 233h | 247 | 5.03  | 0.075 | 59 | - | 6   | 77.5 |   |      |
|      |                     |                       |      |     |       | 5     |    |   | >   | 5    |   |      |
|      |                     |                       |      |     |       |       |    |   | 63  | -    | 6 | 3.5  |
|      |                     |                       |      |     |       |       |    |   |     | >    | 7 |      |
|      |                     |                       |      |     |       | 64    | -  | 6 | 7.5 |      |   |      |
|      |                     |                       |      |     |       |       | >  | 7 |     |      |   |      |
|      |                     |                       |      |     |       | 64    | -  | 6 | 2.6 |      |   |      |
|      |                     |                       |      |     |       |       | >  | 8 |     |      |   |      |
|      |                     |                       | 217  | 218 | 5.69  | 0.001 | 57 | - | 6   | 94.6 |   |      |
|      |                     |                       |      |     |       | 6     |    | > | 5   |      |   |      |
|      |                     |                       |      |     |       |       | 58 | - | 6   | 2.2  |   |      |
|      |                     |                       |      |     |       |       |    | > | 5   |      |   |      |
| (18) | 2-NO <sub>2</sub>   | $4.87 \times 10^{-5}$ | 319  | 320 | 3.88  | 0.407 | 63 | - | 6   | 59.9 |   |      |
|      |                     |                       |      |     |       | 8     |    |   | >   | 6    |   |      |
|      |                     |                       |      |     |       |       |    |   | 64  | -    | 6 | 22.4 |
|      |                     |                       |      |     |       |       |    |   |     | >    | 6 |      |
|      |                     |                       | 221  | 218 | 5.68  | 0.109 | 63 | - | 6   | 61.5 |   |      |
|      |                     |                       |      |     |       | 3     |    | > | 8   |      |   |      |
|      |                     |                       |      |     |       |       | 64 | - | 6   | 19.2 |   |      |
|      |                     |                       |      |     |       |       |    | > | 8   |      |   |      |
